# Supplementary material for: Aerosol trends dominate over global warming-induced cloud feedback in driving recent changes in marine low clouds
Source: Research Square preprint supplement (doi:10.21203/rs.3.rs-5901920/v1), 2025-02-13
Supplement: Supplementary file 1 [file 643793ef75a46344d62c01c3.pdf]

**Aerosol trends dominate over global warming-induced cloud feedback in driving recent changes in marine low clouds**

**Yang Cao<sup>1,2,†</sup>, Hao Wang<sup>1,2,†</sup>, Yannian Zhu<sup>1,2,\*</sup>, Minghuai Wang<sup>1,2,\*</sup>, Daniel Rosenfeld<sup>1,3</sup>, Chen Zhou<sup>1,2</sup>, Zhonghua Zheng<sup>4</sup>, Hugh Coe<sup>4</sup>, David Topping<sup>4</sup>, Jihu Liu<sup>1,2</sup>, Kang-En Huang<sup>1,2</sup>, Yuan Liang<sup>5</sup>, Haipeng Zhang<sup>6,7</sup>, Heming Bai<sup>8</sup>, Man Yue<sup>9</sup>**

<sup>1</sup>School of Atmospheric Sciences, Nanjing University, 210023 Nanjing, China

<sup>2</sup>Joint International Research Laboratory of Atmospheric and Earth System Sciences & Institute for Climate and Global Change Research, Nanjing University, China

<sup>3</sup>Institute of Earth Sciences, The Hebrew University of Jerusalem, Jerusalem 91904, Israel

<sup>4</sup>Department of Earth and Environmental Sciences, The University of Manchester, Manchester M13 9PL, UK

<sup>5</sup>TianJi Weather Science and Technology Company, Beijing, China

<sup>6</sup>Department of Atmospheric and Oceanic Science, University of Maryland, College Park, MD, USA

<sup>7</sup>Earth System Science Interdisciplinary Center, University of Maryland, College Park, MD, USA

<sup>8</sup>Research Center for Intelligent Information Technology, Nantong University, China

<sup>9</sup>Zhejiang Institute of Meteorological Sciences, Hangzhou, China

Corresponding author: Yannian Zhu ([yannian.zhu@nju.edu.cn](mailto:yannian.zhu@nju.edu.cn)) and Minghuai Wang ([minghuai.i.wang@nju.edu.cn](mailto:minghuai.i.wang@nju.edu.cn)). <sup>†</sup> These authors contributed equally to this work.

**Contents of this file**

Text S1.

Figures S1-S8.

33

34 Text S1.

35 We estimated the contributions of ACI and cloud feedback to CRE trends through their  
36 impacts on cloud fraction and albedo based on the sensitivities of cloud properties to  $N_d$   
37 and SST. The sensitivity of low-cloud properties to  $N_d$  was estimated using the deep  
38 learning model combined with a parameter perturbation method, as derived from our  
39 previous work (Cao et al., 2025, submitted). In contrast, the sensitivity of low-cloud  
40 properties to SST was calculated using a linear regression approach (Figure S5). The  
41 respective contributions of CF cloud albedo to CRE changes were then determined based  
42 on their relative proportions of CF and cloud albedo susceptibility to  $N_d$ /SST.

43  
44  
45

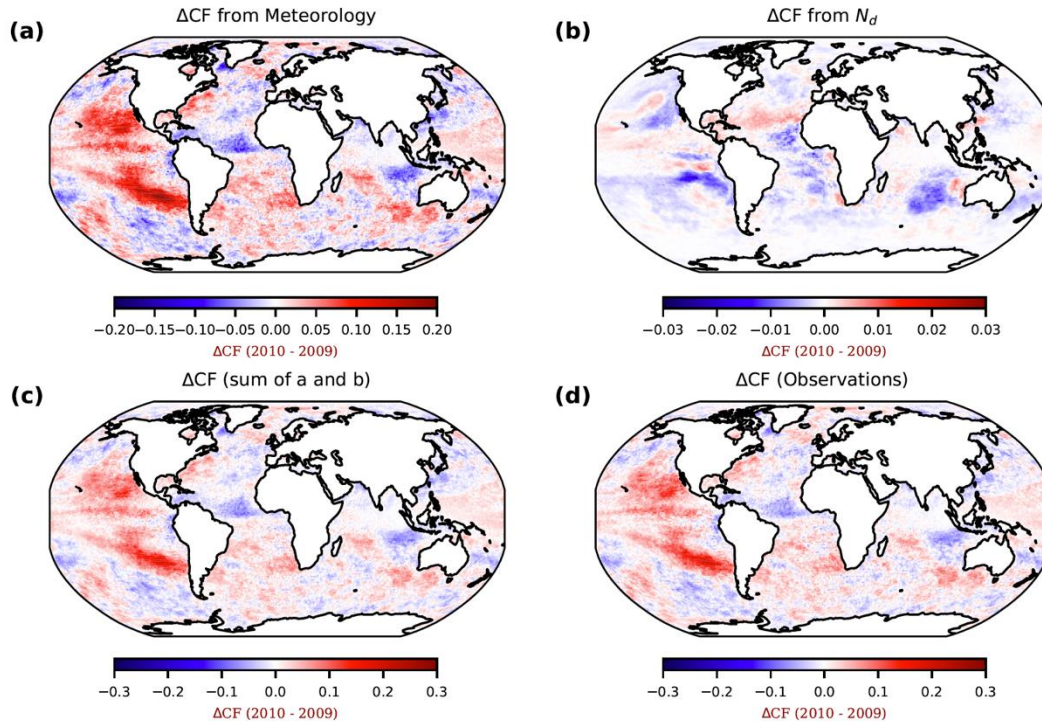

46  
47

48 **Figure S1.**  $CNN_{Met-N_d}$  separates the impacts of ENSO-related changes and  $N_d$  variations on CF.  
49 Panels (a) and (b) illustrate the contributions of meteorological factors and  $\ln(N_d)$  to CF,  
50 respectively. Panel (c) shows the combined effect, representing the sum of panels (a) and (b). Panel  
51 (d) depicts the observed difference in low-cloud CF between 2010 and 2009.

52  
53  
54  
55  
56  
57  
58

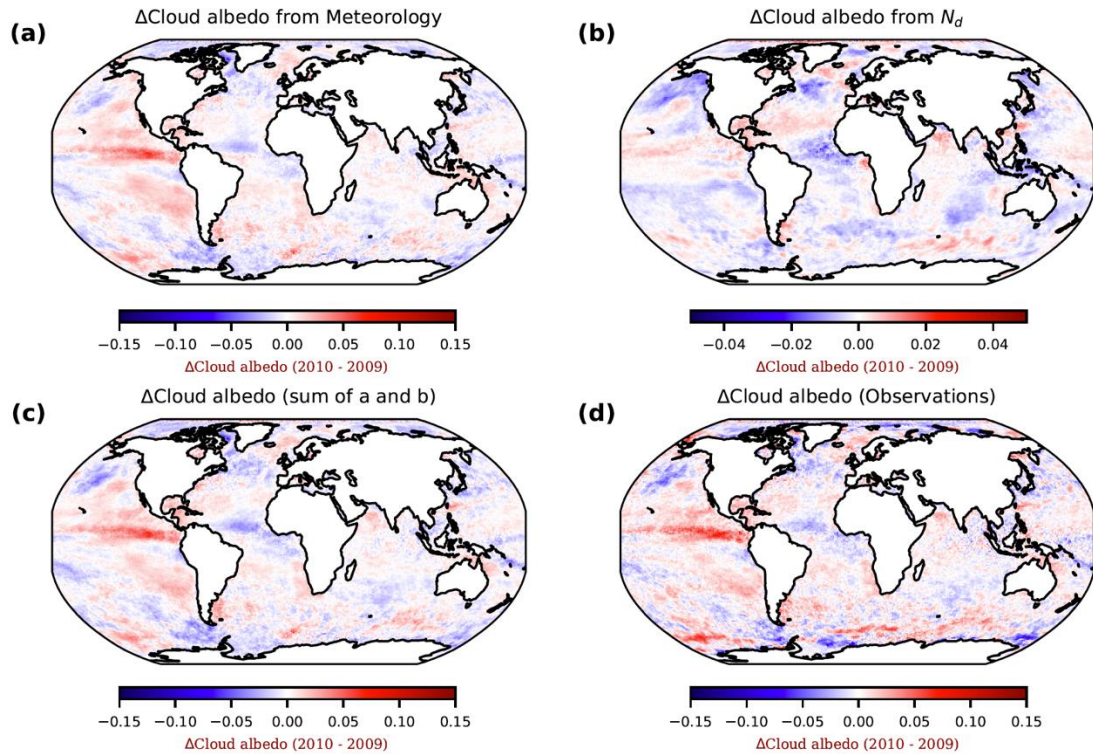

**Figure S2.** CNN<sub>Met-N<sub>d</sub></sub> separates the impacts of ENSO-related changes and N<sub>d</sub> variations on cloud albedo. Panels (a) and (b) illustrate the contributions of meteorological factors and ln(N<sub>d</sub>) to cloud albedo, respectively. Panel (c) shows the combined effect, representing the sum of panels (a) and (b). Panel (d) depicts the observed difference in low-cloud cloud albedo between 2010 and 2009.

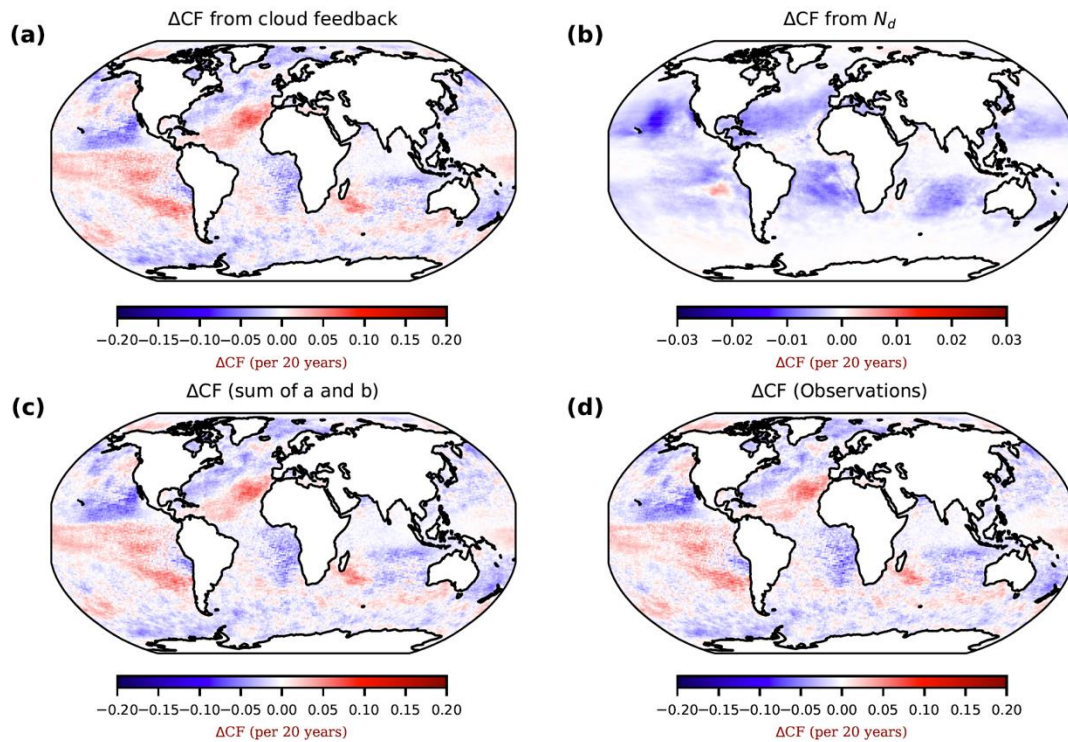

**Figure S3.** Spatial distribution of the effects of cloud feedback and aerosol-cloud interactions (ACI, through  $N_d$ ) on CF trend changes from 2003 to 2022, as derived from the deep learning approach. Panels (a) and (b) illustrate the contributions of cloud feedback and ACI to changes in low-cloud CF. Panel (c) shows the combined effect, calculated as the sum of panels (a) and (b). Panel (d) presents the observed trend in CF based on CERES data for 2003–2022.



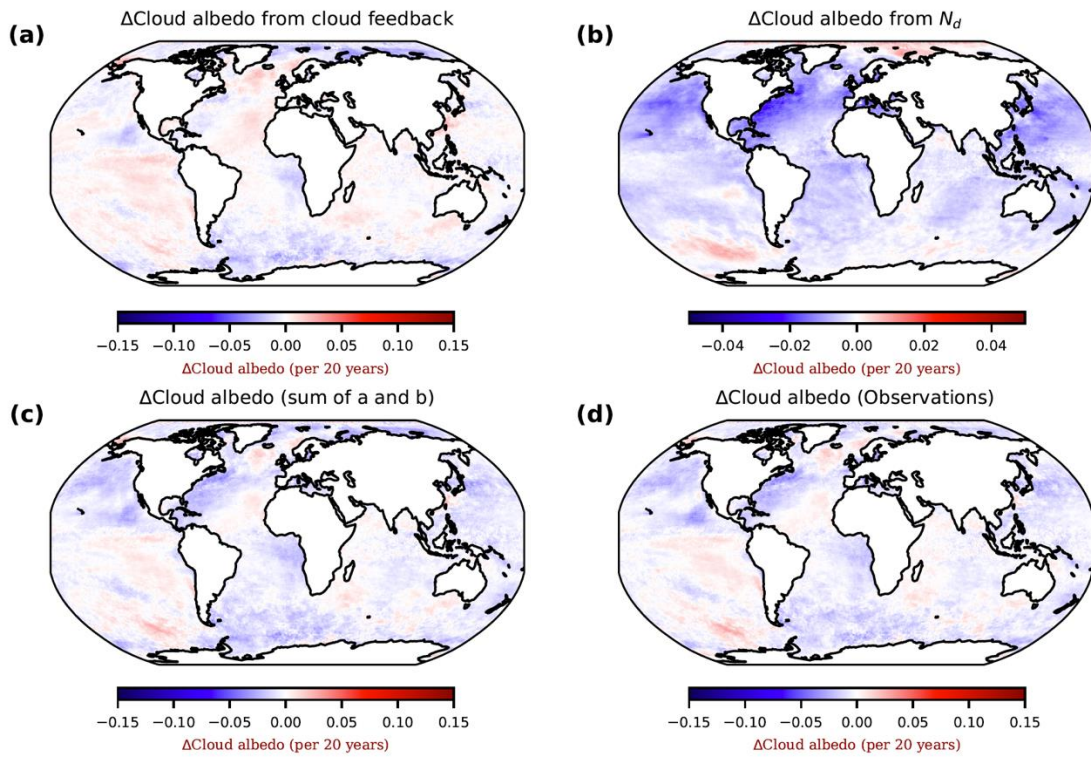

75

76 **Figure S4.** Spatial distribution of the effects of cloud feedback and ACI (through  $N_d$ ) on cloud  
 77 albedo trend changes from 2003 to 2022, as derived from the deep learning approach. Panels (a)  
 78 and (b) illustrate the contributions of cloud feedback and ACI to changes in cloud albedo. Panel (c)  
 79 shows the combined effect, calculated as the sum of panels (a) and (b). Panel (d) presents the  
 80 observed trend in cloud albedo based on CERES data for 2003–2022.

81

82

83

84

85

86

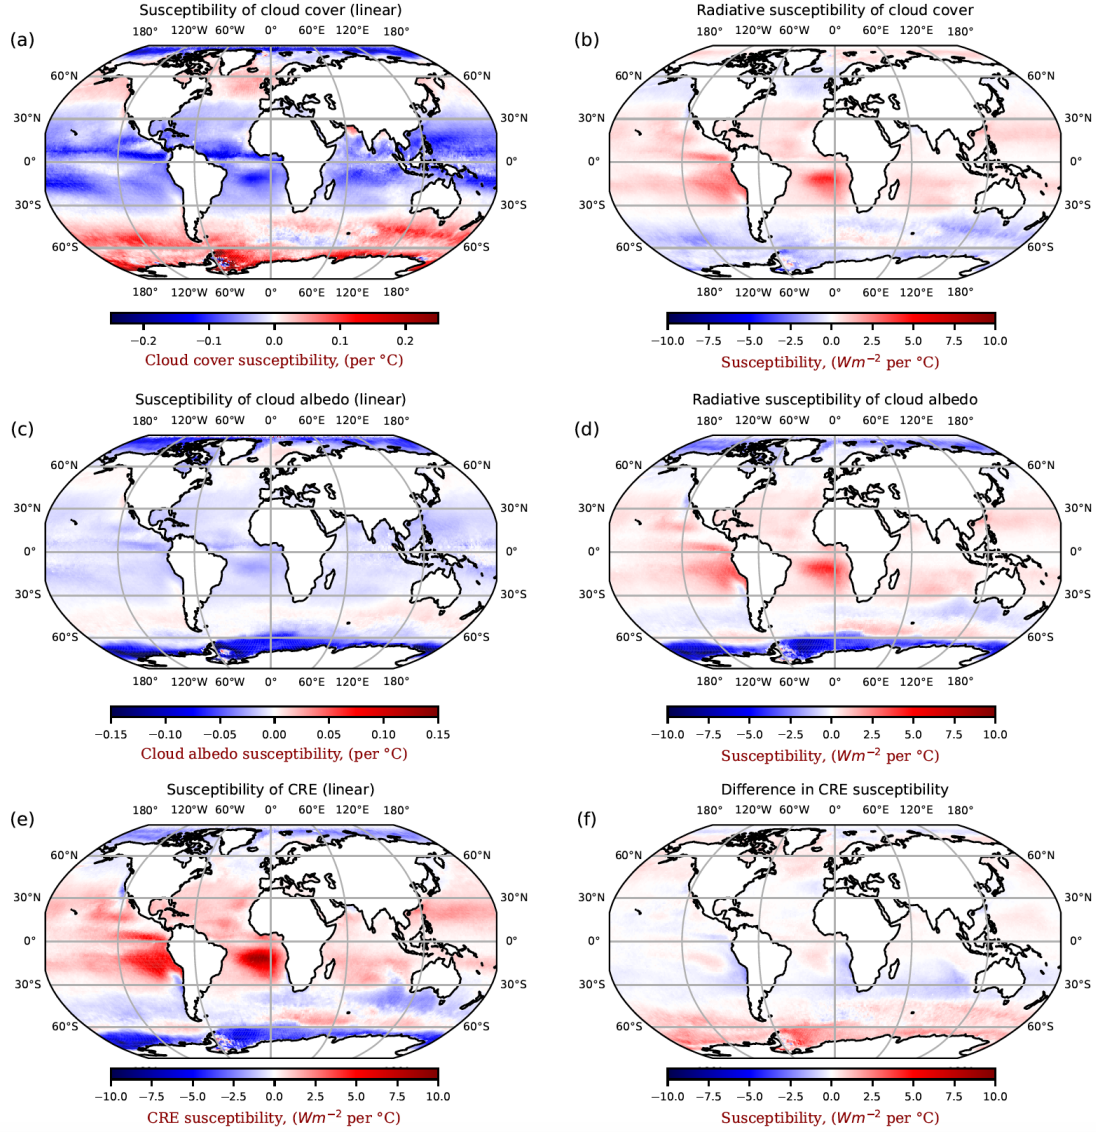

**Figure S5.** Spatial distribution of decomposed cloud susceptibility to SST. Panel (a) illustrates cloud cover (CC) susceptibility to SST, denoted as  $\frac{\partial CC}{\partial SST}$ . Panel (b) presents the radiative susceptibility of cloud cover to SST, expressed as  $\overline{(A_{clr} - A_{cld})} \left( \frac{\partial CC}{\partial SST} \right) F^\downarrow$ .  $A_{clr}$  is the clear-sky albedo and  $F^\downarrow$  is the incoming solar radiation. Panel (c) displays cloud albedo ( $A_{cld}$ ) susceptibility to SST, indicated by  $\frac{\partial A_{cld}}{\partial SST}$ . Panel (d) shows the radiative susceptibility of cloud albedo to SST, represented as  $\overline{CC} \left( \frac{\partial A_{clr}}{\partial SST} - \frac{\partial A_{cld}}{\partial SST} \right) F^\downarrow$ . Panel (e) depicts the CRE susceptibility to SST, denoted by  $\frac{\partial CRE}{\partial SST}$ . Finally, panel (f) illustrates the difference in CRE susceptibility to SST, calculated as the sum of panels (b) and (d) minus panel (e). The scale factor for each grid is derived by dividing Figures S6b and S6d by their sum.

99  
100

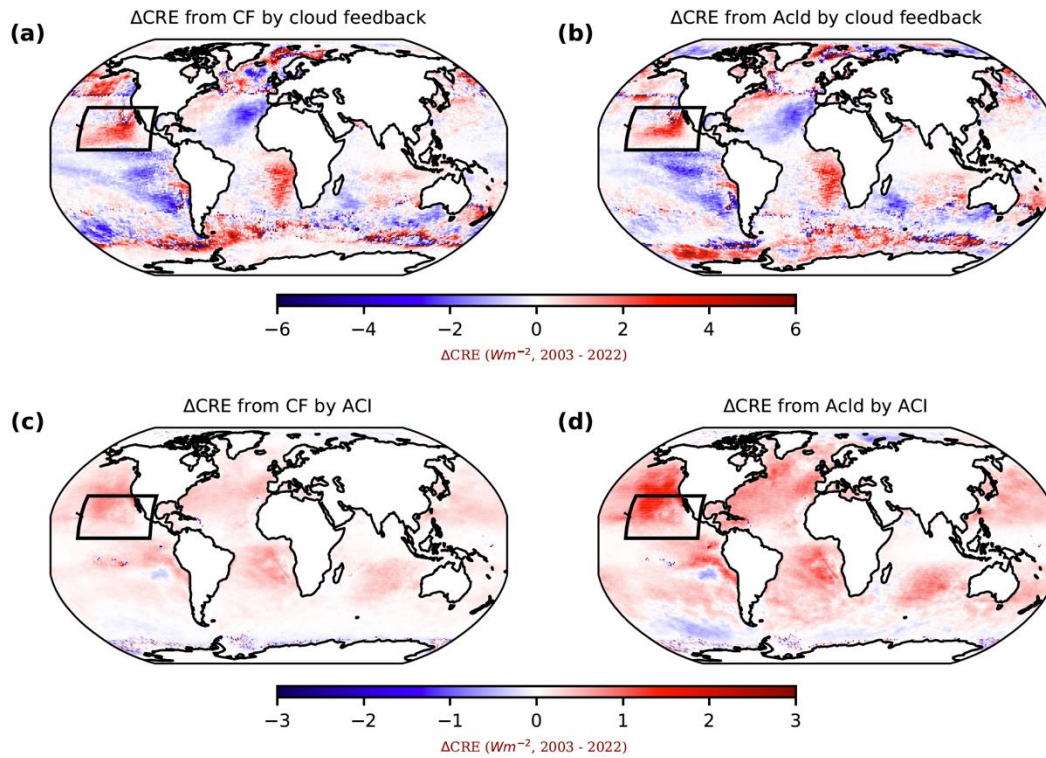

101

102 **Figure S6.** The spatial distribution of  $\Delta\text{CRE}$  from 2003 to 2022 due to CF and cloud albedo (Acld)  
103 influenced by cloud feedback and ACI. Panels a and b illustrate the  $\Delta\text{CRE}$  driven by cloud  
104 feedback, which affect both CF and Acld. In contrast, panels c and d present the  $\Delta\text{CRE}$  induced by  
105 ACI, achieved by adjusting CF and Acld.

106

107



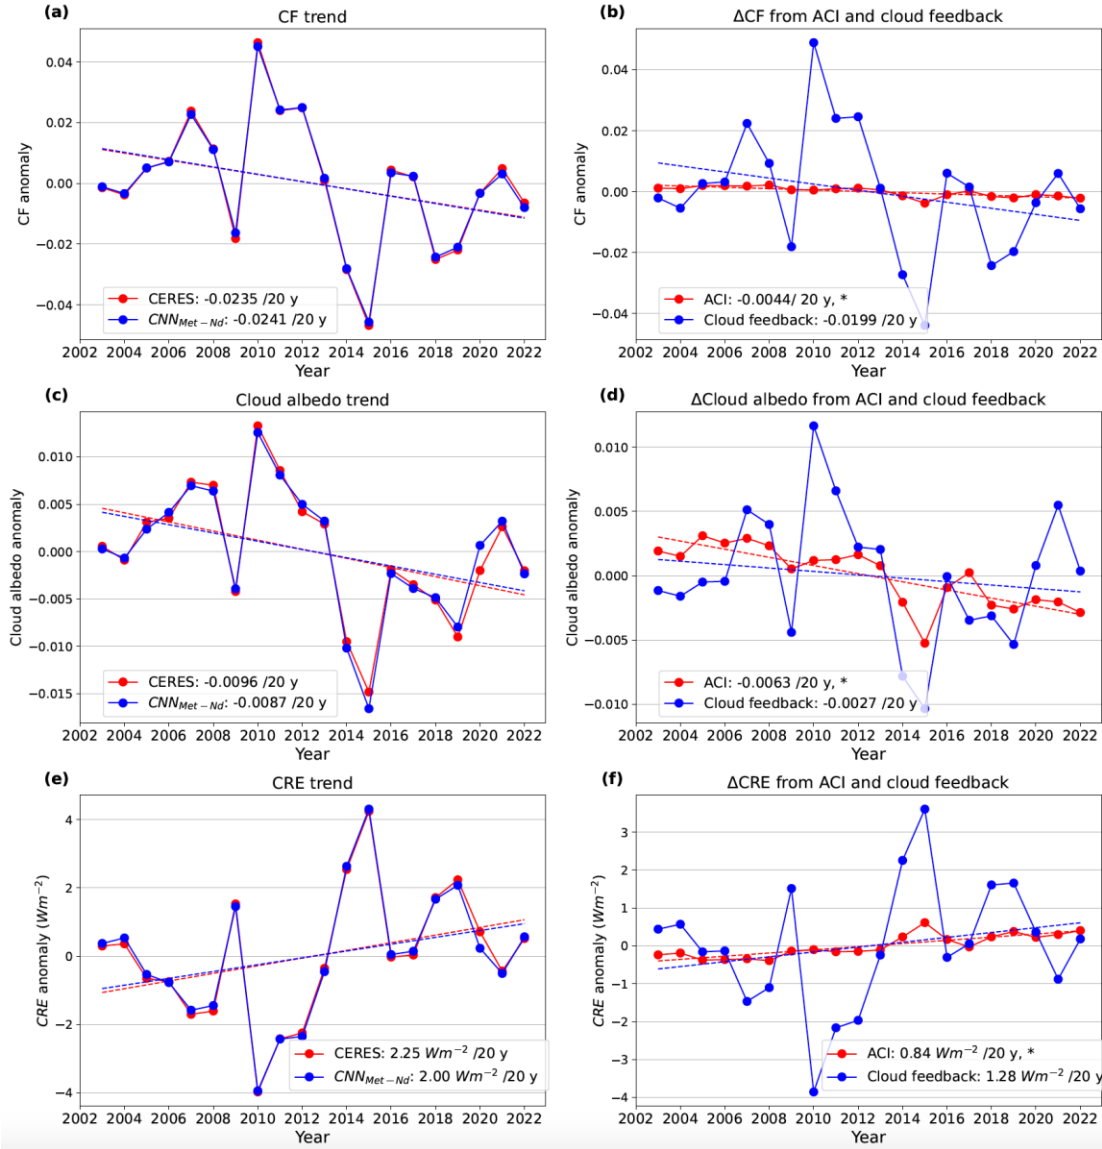

**Figure S7.** Time series of annual mean properties of marine low clouds from observations and predictions over the Northeastern Pacific (Figure S6). The left column represents cloud properties from observations and predictions of the deep learning model. The right column represents cloud changes induced by  $N_d$  and meteorology.

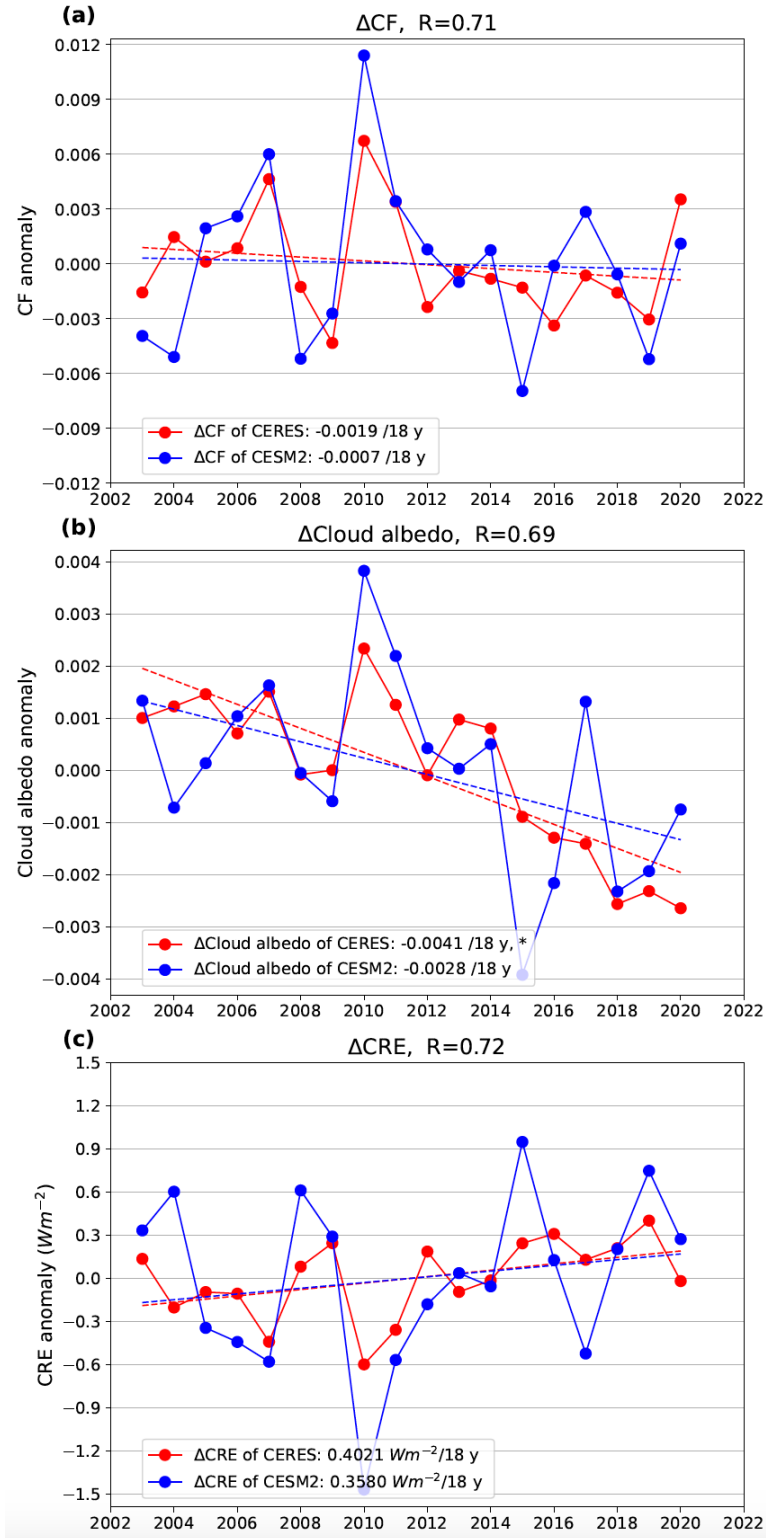

**Figure S8.** Time series of observed and simulated cloud properties from CERES and CESM2 for the period 2003–2020. An asterisk in the legend denotes results that meet the 95% significance level. The correlation coefficient ( $R$ ) quantifies the relationship between the red and blue lines.

119    Reference  
120    Cao et al., Quantifying Nonlinear Cloud Susceptibility and Radiative Forcing from Aerosol-Cloud  
121    Interactions Using Deep Learning.  
122
